# Supplementary material for: Discovery of New States of Immunomodulation for Vaccine Adjuvants via High Throughput Screening: Expanding Innate Responses to PRRs
Source: PubMed Central journal article supplement (PMC10037445; doi:10.1021/acscentsci.2c01351), 2023-02-23
Supplement: oc2c01351_si_002.pdf [file oc2c01351_si_002.pdf]

## **Supplementary Information for**

Discovery of New States of Immunomodulation for Vaccine Adjuvants via High Throughput Screening: Expanding Innate Responses to PRRs

Jeremiah Y. Kim<sup>°</sup>, Matthew G. Rosenberger<sup>°</sup>, Siquan Chen, Carman KM IP, Azadeh Bahmani, Qing Chen, Jinjing Shen, Yifeng Tang, Andrew Wang, Emma Kenna, Minjun Son, Savaş Tay, Andrew L. Ferguson, Aaron P. Esser-Kahn\*  
Email: [aesserkahn@uchicago.edu](mailto:aesserkahn@uchicago.edu)

Pritzker School of Molecular Engineering, University of Chicago, 5640 South Ellis Avenue, Chicago, Illinois 60637, USA.

<sup>°</sup> = these authors contributed equally to this work

\*Correspondence to: [aesserkahn@uchicago.edu](mailto:aesserkahn@uchicago.edu)

### **This PDF file includes:**

- Materials and Methods
- Key Resources Table
- Supplementary text
- Figures S1 to S15
- Tables S1 to S5

## Materials and Methods

### Lead Contact

Further information and requests for resources and reagents should be directed to and will be fulfilled by the lead contact, Aaron Esser-Kahn ([aesserkahn@uchicago.edu](mailto:aesserkahn@uchicago.edu)).

### Materials Availability

This study did not generate new unique reagents.

### Data and Code Availability

Any additional information required to reanalyze the data reported in this paper is available from the lead contact upon request.

### Safety Statement

No unexpected or unusually high safety hazards were encountered.

### NF- $\kappa$ B and IRF Transcription Factor Screening

RAW-Dual cells (InvivoGen) were plated at 50,000 cells per well in 45  $\mu$ L of DMEM with 5% HI FBS from col 2-23 in clear flat bottom 384 well plates (Greiner Bio-One). Cells attached at room temperature for 1 h. 50 nL of 10 mM modulator libraries were added by Janus G3 via pintool to experimental wells (cols 3-22) for a final concentration of 10  $\mu$ M. Following 1 hour incubation, 5  $\mu$ L of PRR agonist was added via a MultiDrop Combi liquid handler (col 3-23). Cells were incubated at 37 °C and 5% CO<sub>2</sub> overnight. 20 hours later, 12.5  $\mu$ L of QuantiLuc Plus was plated in an opaque, white 384 well plate. 5  $\mu$ L of RAW-DUAL cell supernatant was then added via Multi-Drop Combi Liquid handler before measuring luminescent values on a BioTek Synergy NEO2 plate reader as soon as plate was completed. QuantiLuc Plus contains a stabilizer which reduces signal decay, allowing for comparable values throughout the read. In parallel, 15  $\mu$ L of 5X concentrated QuantiBlue was added directly to the remaining cell supernatant in the RAW-Dual cell plate. Absorbance values were measured at varying time intervals at 620 nm. These samples were incubated so that the PRR agonist control reported an absorbance signal of approximately 1 A.U.

### Viability Monitoring

Viability was monitored after overnight modulator addition by monitoring confluency via IncuCyte imaging. Two sets of parameters were used to create a confluency mask over all imaged wells. Modulators were considered toxic if both sets of confluency masks were < 70% of those of resting cells. Confluency masks were quantified using IncuCyte software. This methodology was validated with select library plates using a traditional CellTiter Glo assay (Promega). A more detailed description can be found in *SI Appendix*, Supplementary Information Text.

### THP-1 Cell Culture

THP-1 cells were purchased from ATCC and were cultured in RPMI 1640 with 10% Biotin free HI-FBS and 1% P/S at 37 °C and 5% CO<sub>2</sub>. Cells were maintained between 0.2-1.0 x 10<sup>6</sup> cells/mL and were not differentiated.

### Cytokine Level Screening

THP-1 cells were seeded at 50,000 cells per well in 45  $\mu$ L of biotin-free RPMI + 5%HI-FBS in clear 384 well plates. Following 24h incubation, 50 nL of 10 mM modulator libraries were added by Janus G3 via pintool to experimental wells (cols 3-22) for a final concentration of 10  $\mu$ M. After 1 hour, 5  $\mu$ L of agonist was added via a MultiDrop Combi liquid handler (col 3-23). The following day, 5  $\mu$ L of supernatant was transferred to white low volume ProxiPlates (Perkin Elmer). According to AlphaPlex protocol, 10  $\mu$ L of a prepared acceptor bead (10  $\mu$ g/mL final conc), biotinylated antibody (1 nM final conc) mixture was added via liquid handler to the cell supernatant. After 1hr incubation at RT, 5  $\mu$ L of donor beads (40  $\mu$ g/mL final conc) were added in the dark. After an additional 1hr incubation, plates were read on a BioTek Synergy NEO2 plate

reader with AlphaPlex filters for europium (615 nm) and terbium (545 nm) emission. A separate plate was run each day containing a standard curve of known analyte for interpolation purposes.

### **BMDC Cytokine and Surface Marker Expression**

Bone marrow was harvested from 6-week-old C57BL/6 mice and differentiated into dendritic cells (BMDCs) using supplemented culture medium: RPMI 1640 (Life Technologies), 10% HIFBS (Sigma-Aldrich), Recombinant Mouse GM-CSF (carrier-free)(20 ng/ml; BioLegend), 2 mM L-glutamine (Life Technologies), 1% antibiotic- antimycotic (Life Technologies), and 50 $\mu$ M  $\beta$ -mercaptoethanol (Sigma-Aldrich). After 6 days of culture, BMDCs were plated at 100,000 cells per well and incubated with modulator (10 $\mu$ M). After 1 hour, agonist was added. Cells were incubated for 24 hours at 37°C and 5% CO<sub>2</sub>. Supernatant cytokines were measured using LEGENDplex™ Mouse Inflammation Cytokine Kit (BioLegend). Cells were pelleted, washed, Fc blocked, and stained with the following antibodies/reagents at the recommended manufacturer's concentrations: CD11c-AF700 (N418), CD40-APC (3/23), I-A/I-E-AF488 (M5/114.15.2), CD86-BV605 (GL-1), CD80-PE (16-10A1), Live/Dead Fixable Blue. Data was acquired on a NovoCyte Penton and analyzed via FlowJo 10.8.1.

### **NF- $\kappa$ B Dynamics**

BMM $\Phi$  were generated from bone marrow isolated from 6-12 week old male RelA-YFP<sup>+/+</sup> C57BL/6 mice<sup>50</sup> and cultured in murine m-CSF (Peprotech) for 6-7 days. Custom 64 chamber automated microfluidic devices<sup>51</sup> were mounted on a Nikon Ti2 microscope and coated with fibronectin (Thermo Fisher). BMM $\Phi$  were loaded and allowed to adhere to the cell chambers for 5-7 hours. Cells were incubated with 1  $\mu$ M Hoechst 33342 for 10 minutes to stain cellular nuclei for tracking. Hoechst and YFP images were taken every 6 minutes using excitation wavelengths of 395 nm and 508 nm with an exposure time of 50 ms or 1 s, respectively. During imaging, cells were automatically fed with either media or 10  $\mu$ M modulator for two hours, followed by treatment with media, 10  $\mu$ M modulator, or 10  $\mu$ M modulator + R848. Cell videos were analyzed using custom MATLAB processing software<sup>51</sup> and single cells nuclear/cytoplasmic RelA ratios were tracked throughout the duration of the experiment. Single cell traces features were identified using the MATLAB function 'findpeaks', with a minimum prominence of 0.1 over the starting value and a minimum distance of 30 minutes between peaks. Microfluidic imaging protocol details can be found in Kellogg et al., 2014<sup>42</sup>.

### **In Vivo Studies**

#### **Animals**

All animal procedures were performed under a protocol approved by the University of Chicago Institutional Animal Care and Use Committee (IACUC). 6-to-8-week-old C57/B6 female mice were purchased from the Jackson laboratory. All vaccinations were administered intramuscularly in the left hind leg. Blood was collected from the submandibular vein at time points indicated.

#### **Vaccinations**

VacciGrade Ovalbumin and Addavax was purchased from InvivoGen. VacciGrade CpG ODN 1826, ultrapure flagellin, and VacciGrade R848 were purchased from InvivoGen. Modulators were purchased through Selleck Chemicals.

Mice were lightly anesthetized with isoflurane and injected intramuscularly in the hind leg with an injection volume of 50  $\mu$ L containing antigen, adjuvant, and a DMSO/Addavax combination. Antigen dose was as follows: OVA (100  $\mu$ g). Agonist doses per mouse were as follows: Flagellin, 10  $\mu$ g; R848, 50  $\mu$ g; CpG, 50  $\mu$ g. Modulators were added at 1.5  $\mu$ mol. For commercial vaccines, 35 $\mu$ L of Typhim-Vi (Sanofi Pasteur) or Fluzone 2021-2022 (Sanofi Pasteur) were mixed with 15 $\mu$ L of DMSO with or without 1.5 $\mu$ mol of modulator for each mouse.

#### **Plasma cytokine analysis**

Blood was collected from mice at specified time points in 0.2 mL of heparin-coated collection tubes (VWR Scientific). Plasma was isolated via centrifugation 2000xg at 4C for 15 min. Samples were collected and stored at -80°C until use. Plasma was analyzed using Bio-Legend's

LEGENDplex™ Mouse Inflammation Cytokine Panel (13-Plex) according to the manufacturer's protocol. Samples were analyzed using a NovoCyte Flow Cytometer. Data were analyzed using LEGENDplex™ Data Analysis Software Suite and GraphPad Prism.

#### **Antibody quantification**

Mice were vaccinated with indicated formulations. Blood was collected at time points indicated in 0.2 mL heparin-coated collection tubes (VWR Scientific). Plasma was isolated via centrifugation 2000xg at 4C for 15 min. Samples were collected and stored at -80 °C until use. Anti-ovalbumin antibody levels were analyzed using an anti-OVA IgG ELISA kit (Chondrex) according to the specified protocol. For influenza antibody levels, titers were performed by coating Nunc MaxiSorp ELISA plates (BioLegend) with 100µL of 2µg/mL hemagglutinin protein indicated (Sino Biological) overnight at 4C. Plates were washed and blocked with 150µL 2% (w/v) BSA in PBST for 1hr at RT. Following wash, samples were serially diluted tenfold in blocking buffer for a total volume of 100µL and incubated for 2hr at RT. Following wash, 100 µL of goat anti-mouse IgG HRP conjugate (Invitrogen) diluted 1:10,000 in 0.4% BSA buffer was incubated for 1hr at RT. Following wash, 100µL of 1-Step Ultra TMB was incubated for 4.5min before stopping with 50µL of 2M sulfuric acid. ELISA plates were analyzed using a Multiskan FC plate reader (Thermo Fisher) and absorbance was measured at 450 nm with 620nm correction. Area under the curve measurements were approximated with Riemann sums. Data were analyzed using GraphPad Prism.

#### **Flow Cytometry for Germinal Center/Plasmablast Analysis**

Mice were sacrificed 8 days after boost vaccinations with spleens harvested and placed on ice. Spleens were turned into single cell suspension by dissociation with two frosted glass slides and passage through a 70-µm filter. Red blood cells were lysed with 2mL ACK buffer (Gibco) for 3min before diluting, pelleting, washing, and resuspending in 1mL of RPMI media.

#### **Statistics and replicates**

Data are plotted and reported in the text as the means  $\pm$  SD. Sample size is as indicated in biological replicates in all *in vivo* and *in vitro* experiments. The sample sizes were chosen based on preliminary experiments or literature precedent indicating that the number would be sufficient to detect significant differences in mean values should they exist. *P* values were calculated using a one-way analysis of variance (ANOVA) and Tukey post hoc test or two-tailed unpaired heteroscedastic *t* test where appropriate. Each approach is indicated alongside the experiment.

**Key Resources Table**

| REAGENT or RESOURCE                                                       | SOURCE                   | IDENTIFIER                                       |
|---------------------------------------------------------------------------|--------------------------|--------------------------------------------------|
| <b>Antibodies</b>                                                         |                          |                                                  |
| Hamster Alexa Fluor® 700 anti-mouse CD11c Antibody                        | BioLegend                | AB_528736 (BioLegend Cat. No. 117320)            |
| Rat APC anti-mouse CD40 Antibody                                          | BioLegend                | AB_1134072 (BioLegend Cat. No. 124612)           |
| Rat Alexa Fluor® 488 anti-mouse I-A/I-E Antibody                          | BioLegend                | AB_493524 (BioLegend Cat. No. 107615)            |
| Rat Brilliant Violet 605™ anti-mouse CD86 Antibody                        | BioLegend                | AB_11204429 (BioLegend Cat. No. 105037)          |
| Hamster PE anti-mouse CD80 Antibody                                       | BioLegend                | AB_313129 (BioLegend Cat. No. 104708)            |
| Goat anti-Mouse IgG (H+L) Secondary Antibody, HRP                         | Thermo Fisher Scientific | AB_228307 (ThermoFisher Cat. No. 31430)          |
| Brilliant Violet 605™ anti-mouse CD138 (Syndecan-1) Antibody              | BioLegend                | AB_2715767 (BioLegend Cat. No. 142531)           |
| APC/Cyanine7 anti-mouse CD4 Antibody                                      | BioLegend                | AB_312699 (BioLegend Cat. No. 100414)            |
| TruStain FcX™ PLUS (anti-mouse CD16/32) Antibody                          | BioLegend                | AB_2783138 (BioLegend Cat. No. 156604)           |
|                                                                           |                          |                                                  |
| PE anti-mouse/human GL7 Antigen (T and B cell Activation Marker) Antibody | BioLegend                | AB_2562926 (BioLegend Cat. No. 144608)           |
| Alexa Fluor® 488 anti-mouse Ly-6A/E (Sca-1) Antibody                      | BioLegend                | AB_493270 (BioLegend Cat. No. 108115)            |
| PerCP anti-mouse CD19 Antibody                                            | BioLegend                | AB_2072926 (BioLegend Cat. No. 115532)           |
| Brilliant Violet 785™ anti-mouse CD3 Antibody                             | BioLegend                | AB_2562554 (BioLegend Cat. No. 100232)           |
|                                                                           |                          |                                                  |
| PE/Cyanine7 anti-mouse CD279 (PD-1) Antibody                              | BioLegend                | AB_10696422 (BioLegend Cat. No. 135215)          |
| BUV737 Hamster Anti-Mouse CD95                                            | BD Biosciences           | AB_2871122 (BD Biosciences Cat. No. 741763)      |
| BUV615 Rat Anti-Mouse CD185 (CXCR5)                                       | BD Biosciences           | Clone 2G8 (RUO) (BD Biosciences Cat. No. 752549) |
| <b>Bacterial and virus strains</b>                                        |                          |                                                  |
| Fluzone® Quadrivalent 2021-2022 Influenza Vaccine                         | Sanofi Pasteur           | Cat# 635-15                                      |
| <b>Chemicals, peptides, and recombinant proteins</b>                      |                          |                                                  |
| LIVE/DEAD™ Fixable Blue Dead Cell Stain Kit                               | Invitrogen               | Cat# L23105                                      |
| Pam2CSK4                                                                  | InvivoGen                | Cat# tlr-pm2s-1                                  |
| Pam3CSK4                                                                  | InvivoGen                | Cat# tlr-pms                                     |
| Poly(I:C) HMW                                                             | InvivoGen                | Cat# tlr-pic                                     |
| LPS-EK Ultrapure                                                          | InvivoGen                | Cat# tlr-pekllps                                 |
| MPLA-SM Vaccigrade™                                                       | InvivoGen                | Cat# vac-mpla                                    |
| Flagellin FliC Vaccigrade™                                                | InvivoGen                | Cat# vac-fla                                     |
| Imiquimod (R837)                                                          | InvivoGen                | Cat# tlr-imq                                     |
| R848 (Resiquimod)                                                         | InvivoGen                | Cat# tlr-r848-5                                  |
| TL8-506                                                                   | InvivoGen                | Cat# tlr-tl8506                                  |
| Tri-DAP                                                                   | InvivoGen                | Cat# tlr-tdap                                    |

|                                                         |                          |                                                                   |
|---------------------------------------------------------|--------------------------|-------------------------------------------------------------------|
| MDP                                                     | InvivoGen                | Cat# tlr1-mdp                                                     |
| 3'3'-cGAMP                                              | InvivoGen                | Cat# tlr1-nacga-1                                                 |
| ODN 1826 (Type B)                                       | AdipoGen                 | Cat# IAX-200-002-3001                                             |
| Recombinant Mouse IFN-beta                              | Biotechne R&D Systems    | Cat# 8234-MB-010/CF                                               |
| NF-κB Signaling Compound Library                        | MedChemExpress           | Cat# HY-L014                                                      |
| NF-κB Signaling Compound Library                        | Selleck Chemicals        | Cat# L5500                                                        |
| Inhibitor Library                                       | Selleck Chemicals        | Cat# L1100                                                        |
| Typhim Vi® Polysaccharide Vaccine                       | Sanofi Pasteur           | Cat# 790-20                                                       |
| Recombinant Hemagglutinin A/Victoria/2570/2019          | Sino Biological          | Cat# 40787-V08H                                                   |
| Recombinant Hemagglutinin B/Phuket/3073/2013            | Sino Biological          | Cat# 40498-V08B                                                   |
| EndoFit Ovalbumin                                       | InvivoGen                | Cat# vac-pova                                                     |
| AddaVax™                                                | InvivoGen                | Cat# vac-adx-10                                                   |
| Alexa Fluor™ 647 Microscale Protein Labeling Kit        | Thermo Fisher Scientific | Cat#A300009                                                       |
| <b>Critical commercial assays</b>                       |                          |                                                                   |
| IFN-β (human) AlphaLISA Detection Kiti hav              | Perkin Elmer             | Cat# AL3133C                                                      |
| CCL4/MIP-1β (human) AlphaLISA Detection Kit             | Perkin Elmer             | Cat# AL258C                                                       |
| IL-12/IL-23 (human) AlphaLISA Detection Kit             | Perkin Elmer             | Cat# AL382HV                                                      |
| AlphaPlex-545 (Tb) Human IP10 Detection Kit             | Perkin Elmer             | Cat# AP326TB-HV                                                   |
| AlphaPlex-545 (Tb) Human IL1β Detection Kit             | Perkin Elmer             | Cat# AP220TB-HV                                                   |
| AlphaPlex-545 (Tb) Human TNFα Detection Kit             | Perkin Elmer             | Cat# AP208TB-HV                                                   |
| LEGENDPlex™ Mouse Inflammation Cytokine Panel (13-Plex) | BioLegend                | Cat# 740150                                                       |
|                                                         |                          |                                                                   |
| Mouse Anti-OVA IgG Antibody Assay Kit                   | Chondrex                 | Cat# 3011                                                         |
| <b>Experimental models: Cell lines</b>                  |                          |                                                                   |
| RAW-Dual Cells                                          | InvivoGen                | Cat# rawd-ismip                                                   |
| THP1-Dual Cells                                         | InvivoGen                | Cat# thpd-nfis                                                    |
| THP1 Cells                                              | ATCC                     | Cat# TIB-202                                                      |
| <b>Experimental models: Organisms/strains</b>           |                          |                                                                   |
| C57BL/6 mice                                            | Jackson Laboratory       | IMSR_JAX:000664                                                   |
| RelA-YFP <sup>+/+</sup> C57BL/6                         | Gift from Alex Hoffmann  |                                                                   |
| <b>Software and algorithms</b>                          |                          |                                                                   |
| NFKB dynamics processing software                       | Kellogg et al., 2014     | N/A                                                               |
| GraphPad Prism                                          | Dotmatics                | <a href="https://www.graphpad.com/">https://www.graphpad.com/</a> |
| FlowJo                                                  | Becton Dickinson         | <a href="https://www.flowjo.com/">https://www.flowjo.com/</a>     |
|                                                         |                          |                                                                   |

## Supplementary Information Text

### Cell Viability Analysis Via Confluency Masks

Cells were imaged using an IncuCyte S3 instrument (Sartorius). Confluency masks were created using the IncuCyte 2019B built-in analysis software. Two independent masks parameter sets were developed to better capture minute morphology differences between conditions.

#### Parameter set 1:

Segmentation Adjustment: 0.1

*Cleanup*

Hole Fill: 10 $\mu\text{m}^2$ , Adjust Size: 3 pixels

*Filters*

Area: min 1000  $\mu\text{m}^2$ , Eccentricity: max 0.75

#### Parameter set 2:

Segmentation Adjustment: 1.0

*Cleanup*

Hole Fill: 0 $\mu\text{m}^2$ , Adjust Size: -5 pixels

*Filters*

Area: min 1000  $\mu\text{m}^2$ , Eccentricity: N/A

Confluency percentages for all wells were calculated with both parameter sets and exported into Excel. Confluency for modulator treated wells was compared to the average confluency across all agonist-treated control wells. Modulators whose confluency measured less than 70% of the agonist-treated control wells were labeled cytotoxic. Modulators labeled cytotoxic in both parameter sets were removed from further study.

|   |       |                  |                     |       |       |       |       |       |       |       |       |       |       |       |       |       |       |       |       |       |       |       |                     |       |
|---|-------|------------------|---------------------|-------|-------|-------|-------|-------|-------|-------|-------|-------|-------|-------|-------|-------|-------|-------|-------|-------|-------|-------|---------------------|-------|
|   | 1     | 2                | 3                   | 4     | 5     | 6     | 7     | 8     | 9     | 10    | 11    | 12    | 13    | 14    | 15    | 16    | 17    | 18    | 19    | 20    | 21    | 22    | 23                  | 24    |
| A | Empty | Empty            | Empty               | Empty | Empty | Empty | Empty | Empty | Empty | Empty | Empty | Empty | Empty | Empty | Empty | Empty | Empty | Empty | Empty | Empty | Empty | Empty | Empty               | Empty |
| B | Empty | Empty            | Empty               | Empty | Empty | Empty | Empty | Empty | Empty | Empty | Empty | Empty | Empty | Empty | Empty | Empty | Empty | Empty | Empty | Empty | Empty | Empty | Empty               | Empty |
| C | Empty | DMSO Neg Control | <h1>Modulators</h1> |       |       |       |       |       |       |       |       |       |       |       |       |       |       |       |       |       |       |       | Agonist Pos Control | Empty |
| D | Empty |                  |                     |       |       |       |       |       |       |       |       |       |       |       |       |       |       |       |       |       |       |       |                     | Empty |
| E | Empty |                  |                     |       |       |       |       |       |       |       |       |       |       |       |       |       |       |       |       |       |       |       |                     | Empty |
| F | Empty |                  |                     |       |       |       |       |       |       |       |       |       |       |       |       |       |       |       |       |       |       |       |                     | Empty |
| G | Empty |                  |                     |       |       |       |       |       |       |       |       |       |       |       |       |       |       |       |       |       |       |       |                     | Empty |
| H | Empty |                  |                     |       |       |       |       |       |       |       |       |       |       |       |       |       |       |       |       |       |       |       |                     | Empty |
| I | Empty |                  |                     |       |       |       |       |       |       |       |       |       |       |       |       |       |       |       |       |       |       |       |                     | Empty |
| J | Empty |                  |                     |       |       |       |       |       |       |       |       |       |       |       |       |       |       |       |       |       |       |       |                     | Empty |
| K | Empty |                  |                     |       |       |       |       |       |       |       |       |       |       |       |       |       |       |       |       |       |       |       |                     | Empty |
| L | Empty |                  |                     |       |       |       |       |       |       |       |       |       |       |       |       |       |       |       |       |       |       |       |                     | Empty |
| M | Empty |                  |                     |       |       |       |       |       |       |       |       |       |       |       |       |       |       |       |       |       |       |       |                     | Empty |
| N | Empty |                  |                     |       |       |       |       |       |       |       |       |       |       |       |       |       |       |       |       |       |       |       |                     | Empty |
| O | Empty |                  |                     |       |       |       |       |       |       |       |       |       |       |       |       |       |       |       |       |       |       |       |                     | Empty |
| P | Empty |                  |                     |       |       |       |       |       |       |       |       |       |       |       |       |       |       |       |       |       |       |       |                     | Empty |
| Q | Empty | Empty            | Empty               | Empty | Empty | Empty | Empty | Empty | Empty | Empty | Empty | Empty | Empty | Empty | Empty | Empty | Empty | Empty | Empty | Empty | Empty | Empty | Empty               | Empty |
| R | Empty | Empty            | Empty               | Empty | Empty | Empty | Empty | Empty | Empty | Empty | Empty | Empty | Empty | Empty | Empty | Empty | Empty | Empty | Empty | Empty | Empty | Empty | Empty               | Empty |

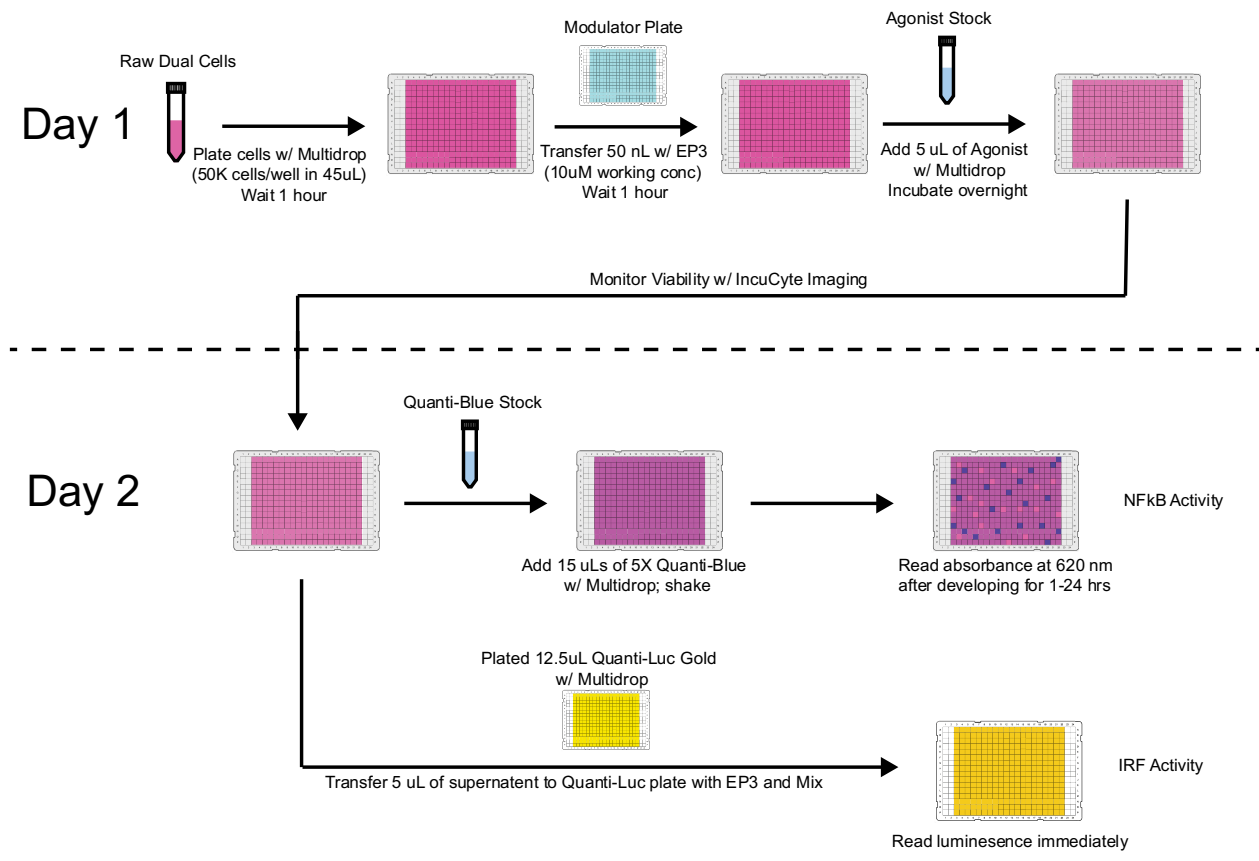

**Fig. S1. High Throughput screening of NF- $\kappa$ B and IRF transcription factors.** Layout of Primary Screen plates (N=14 plates) and schematic representation of the Primary Screen workflow.



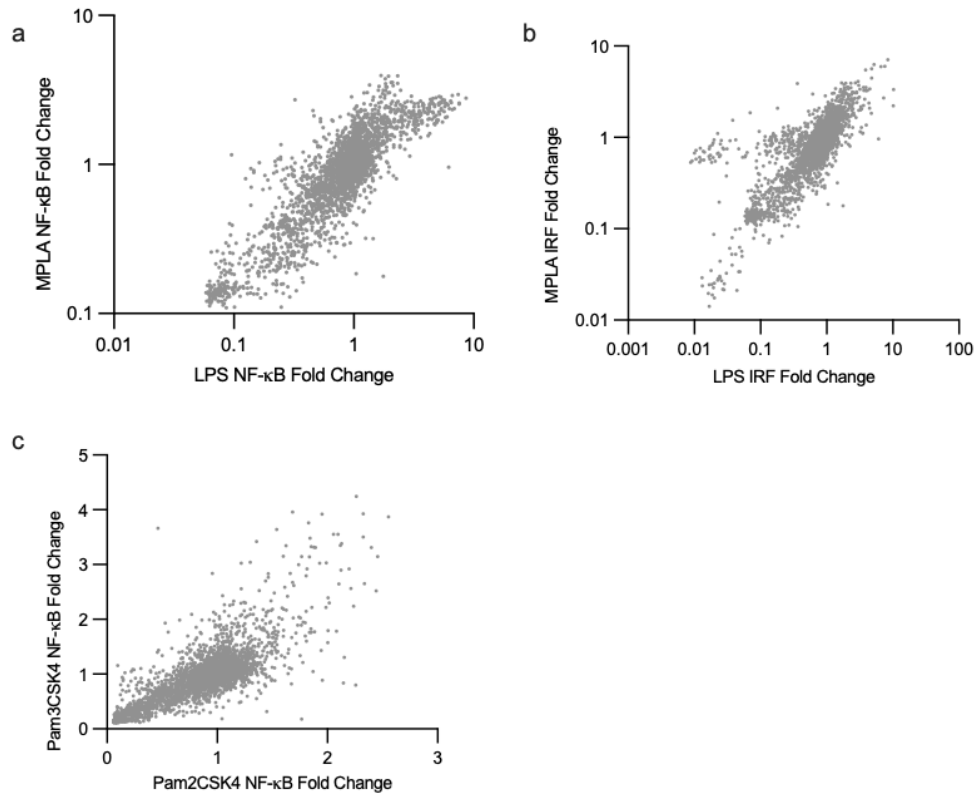

**Fig. S2. Comparing NF-κB and IRF activity between similar agonists shows correlative activity.** A) MPLA (TLR4) vs LPS (TLR4) NF-κB transcription factor fold change B) MPLA vs LPS IRF transcription factor fold change c) Pam2CSK4 (TLR2/6) versus Pam3CSK4 (TLR2/1) NF-κB transcription factor fold change

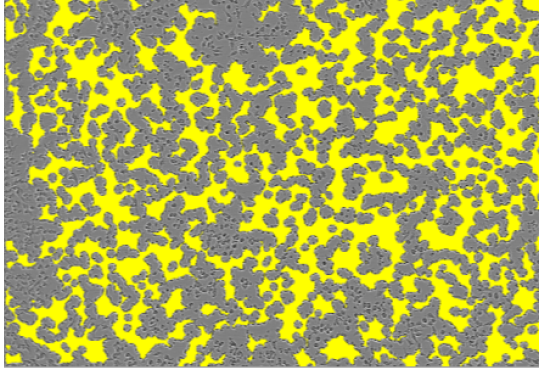

Parameter Set 1

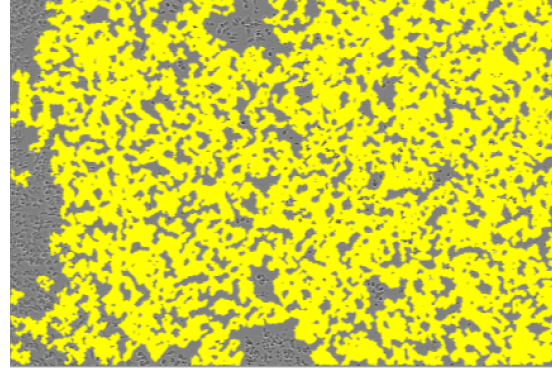

Parameter Set 2

|   | 1     | 2     | 3     | 4     | 5     | 6     | 7     | 8     | 9     | 10    | 11    | 12    | 13    | 14    | 15    | 16    | 17    | 18    | 19    | 20    | 21    | 22    | 23    | 24    |
|---|-------|-------|-------|-------|-------|-------|-------|-------|-------|-------|-------|-------|-------|-------|-------|-------|-------|-------|-------|-------|-------|-------|-------|-------|
| a | Empty | Empty | Empty | Empty | Empty | Empty | Empty | Empty | Empty | Empty | Empty | Empty | Empty | Empty | Empty | Empty | Empty | Empty | Empty | Empty | Empty | Empty | Empty | Empty |
| b | Empty | Empty | Empty | Empty | Empty | Empty | Empty | Empty | Empty | Empty | Empty | Empty | Empty | Empty | Empty | Empty | Empty | Empty | Empty | Empty | Empty | Empty | Empty | Empty |
| c | Empty | 0     | 0     | 0     | 0     | 0     | 0     | 0     | 0     | 0     | 0     | 0     | 0     | 0     | 0     | 0     | 0     | 0     | 0     | 0     | 0     | 0     | 0     | 0     |
| d | Empty | 0     | 0     | 0     | 0     | 0     | 0     | 0     | 0     | 0     | 0     | 0     | 0     | 0     | 0     | 0     | 0     | 0     | 0     | 0     | 0     | 0     | 0     | 0     |
| e | Empty | 0     | 0     | 0     | 0     | 0     | 0     | 0     | 0     | 0     | 0     | 0     | 0     | 0     | 0     | 0     | 0     | 0     | 0     | 0     | 0     | 0     | 0     | 0     |
| f | Empty | 0     | 0     | 0     | 0     | 0     | 0     | 0     | 0     | 0     | 0     | 0     | 0     | 0     | 0     | 0     | 0     | 0     | 0     | 0     | 0     | 0     | 0     | 0     |
| g | Empty | 0     | 0     | 0     | 0     | 0     | 0     | 0     | 0     | 0     | 0     | 0     | 0     | 0     | 0     | 0     | 0     | 0     | 0     | 0     | 0     | 0     | 0     | 0     |
| h | Empty | 0     | 0     | 0     | 0     | 0     | 0     | 0     | 0     | 0     | 0     | 0     | 0     | 0     | 0     | 0     | 0     | 0     | 0     | 0     | 0     | 0     | 0     | 0     |
| i | Empty | 0     | 0     | 0     | 0     | 0     | 0     | 0     | 0     | 0     | 0     | 0     | 0     | 0     | 0     | 0     | 0     | 0     | 0     | 0     | 0     | 0     | 0     | 0     |
| j | Empty | 0     | 0     | 0     | 0     | 0     | 0     | 0     | 0     | 0     | 0     | 0     | 0     | 0     | 0     | 0     | 0     | 0     | 0     | 0     | 0     | 0     | 0     | 0     |
| k | Empty | 0     | 0     | 0     | 0     | 0     | 0     | 0     | 0     | 0     | 0     | 0     | 0     | 0     | 0     | 0     | 0     | 0     | 0     | 0     | 0     | 0     | 0     | 0     |
| l | Empty | 0     | 0     | 0     | 0     | 0     | 0     | 0     | 0     | 0     | 0     | 0     | 0     | 0     | 0     | 0     | 0     | 0     | 0     | 0     | 0     | 0     | 0     | 0     |
| m | Empty | 0     | 0     | 0     | 0     | 0     | 0     | 0     | 0     | 0     | 0     | 0     | 0     | 0     | 0     | 0     | 0     | 0     | 0     | 0     | 0     | 0     | 0     | 0     |
| n | Empty | 0     | 0     | 0     | 0     | 0     | 0     | 0     | 0     | 0     | 0     | 0     | 0     | 0     | 0     | 0     | 0     | 0     | 0     | 0     | 0     | 0     | 0     | 0     |
| o | Empty | Empty | Empty | Empty | Empty | Empty | Empty | Empty | Empty | Empty | Empty | Empty | Empty | Empty | Empty | Empty | Empty | Empty | Empty | Empty | Empty | Empty | Empty | Empty |
| p | Empty | Empty | Empty | Empty | Empty | Empty | Empty | Empty | Empty | Empty | Empty | Empty | Empty | Empty | Empty | Empty | Empty | Empty | Empty | Empty | Empty | Empty | Empty | Empty |

**Fig. S3. Viability filter analysis identifies cytostatic and cytotoxic compounds in primary screen.** A) Representative images of positive controls for both IncuCyte analysis parameter sets B) Representative library plate viability. Wells/compounds shown in red were determined as nonviable via the method described in the Supplemental Text.

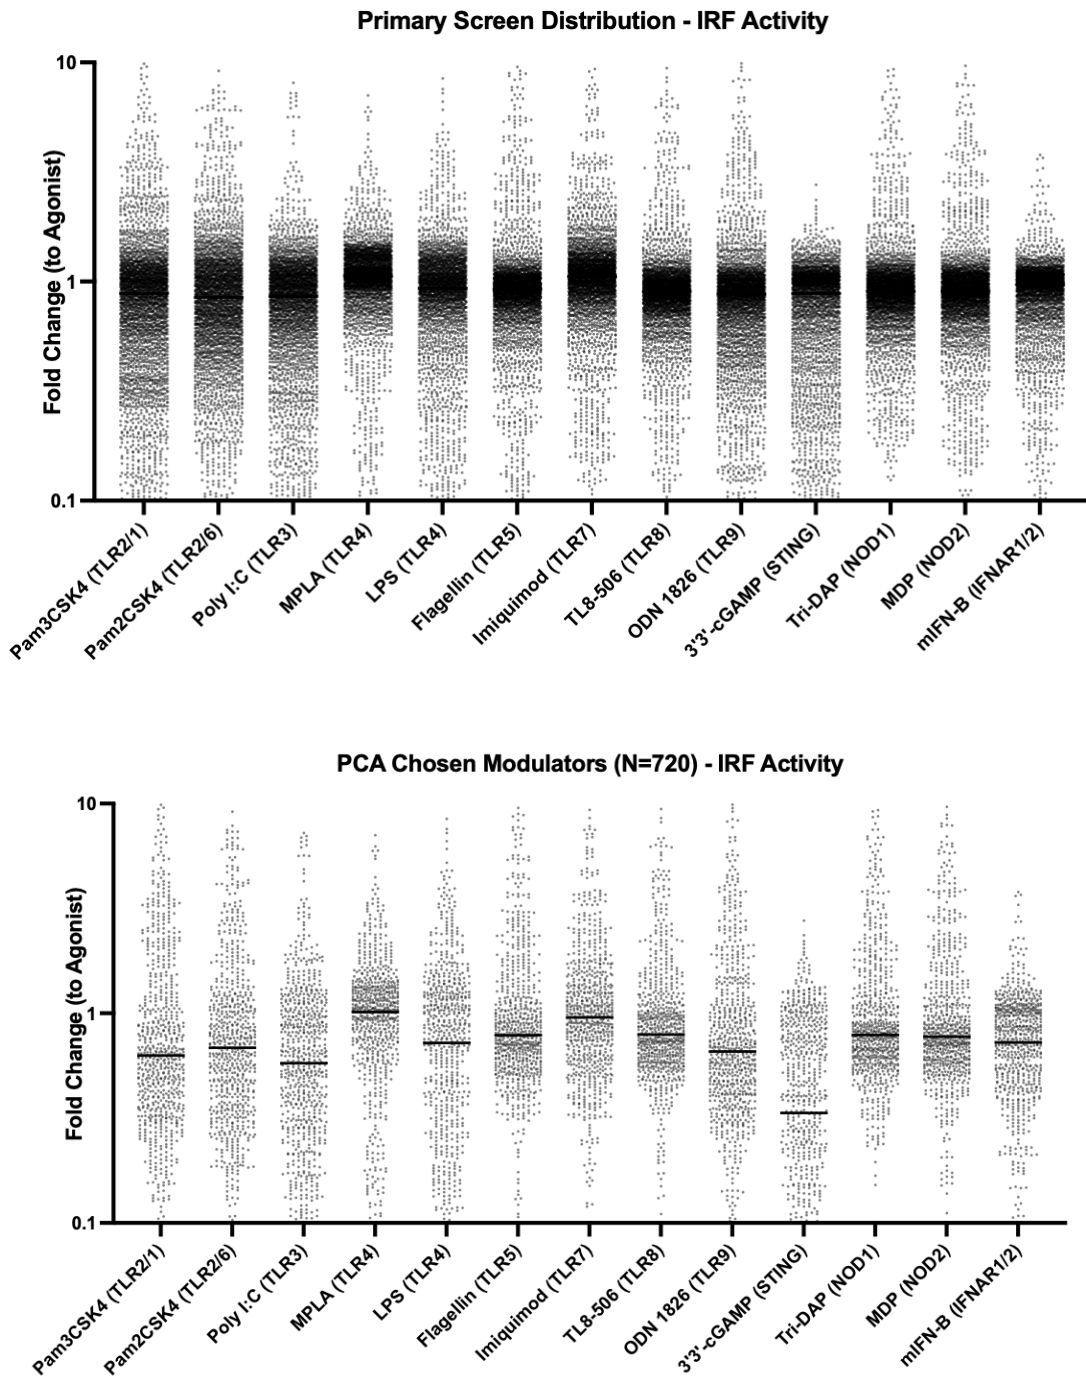

**Fig. S4. Verification of PCA down-selection analysis.** A) Full primary screen distribution (N=3147) for IRF transcription factor activity. B) Distribution of Modulators chosen by PCA cutting analysis (N=720) shows retention of tails of NF- $\kappa$ B and IRF distributions and a significant reduction of modulators around a fold change of 1.

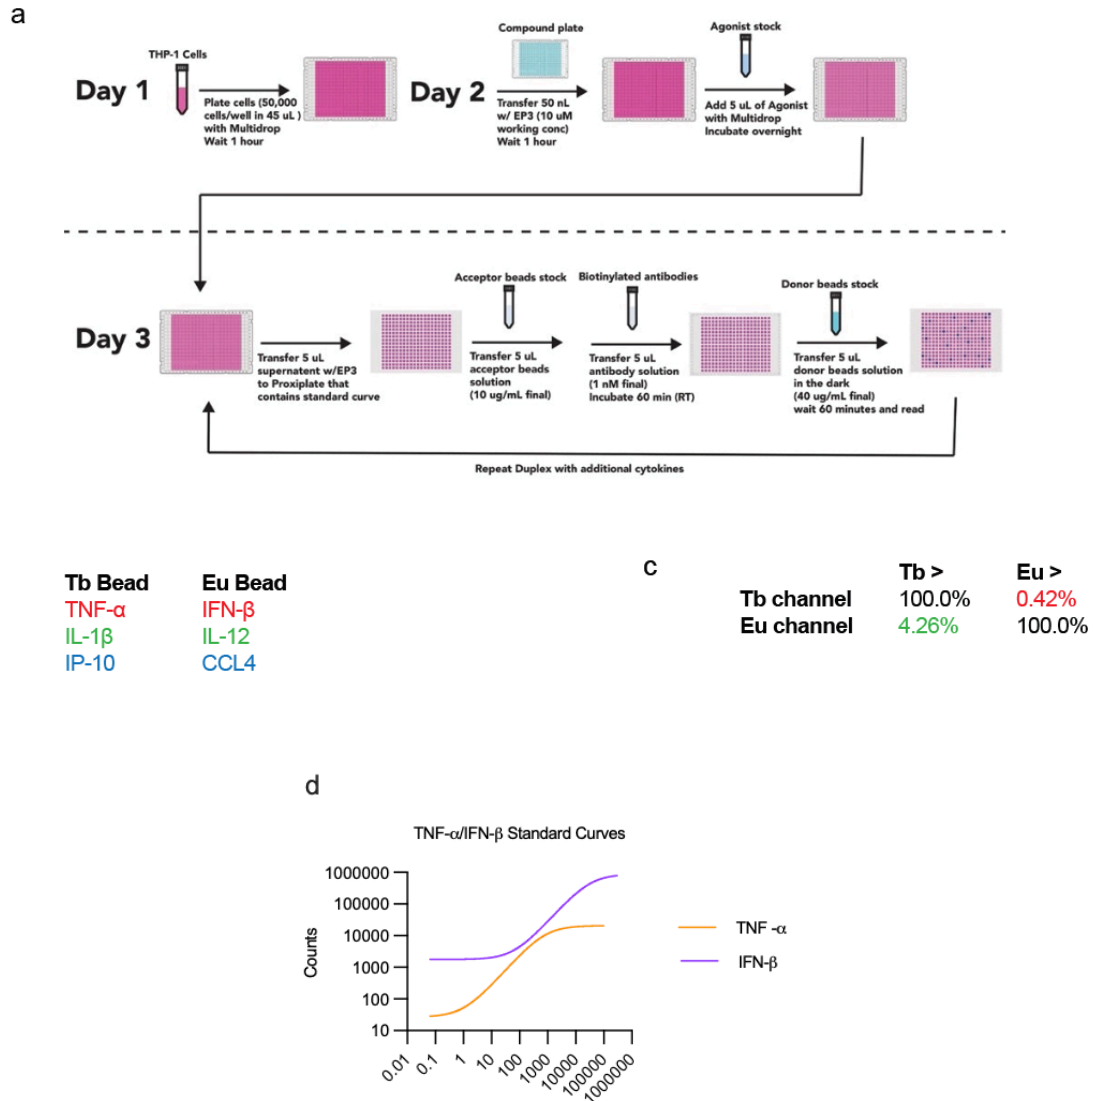

**Fig. S5. Cytokine screen workflow and optimization.** A) Schematic representation of the AlphaPlex workflow B) Table of beads for each cytokine duplex. C) Correction factors for terbium and europium emission needed for multiplexing cytokines. D) Representative standard curve used in interpolation

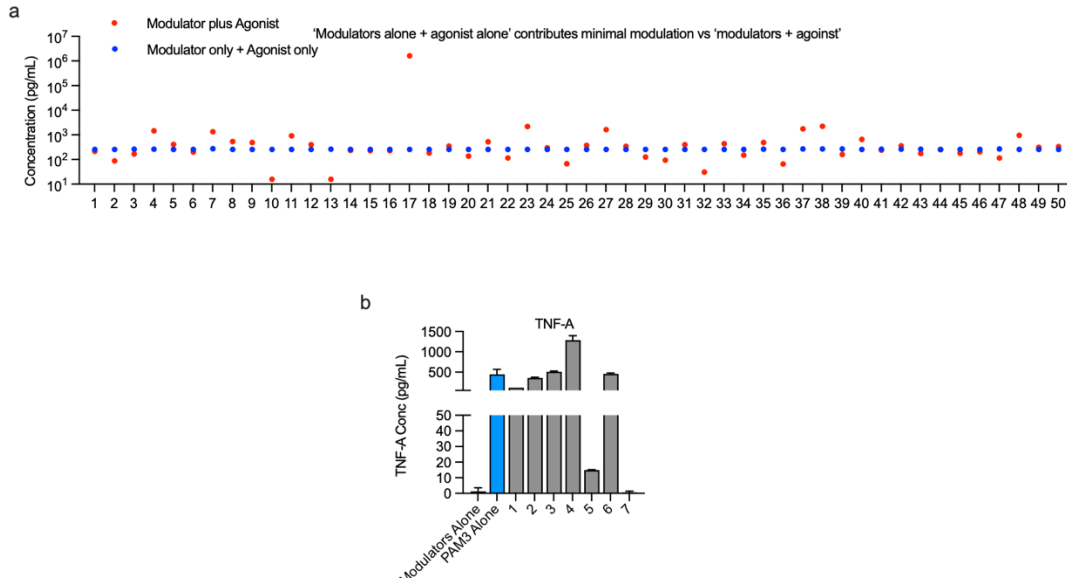

**Fig. S6. Modulators alone do not inherently stimulate cytokine production. A)** Representative data comparing the summation of modulator only + agonist only IL-1 $\beta$  expression levels (Blue) to modulator + agonist IL-1 $\beta$  expression (Red) with Pam3CSK4 (TLR2/1) as the agonist. **B)** Modulators alone produce minimal cytokine secretion (TNF- $\alpha$  shown). Addition of modulators to agonist modulate cytokine secretion over 3 orders of magnitude using Pam3CSK4.

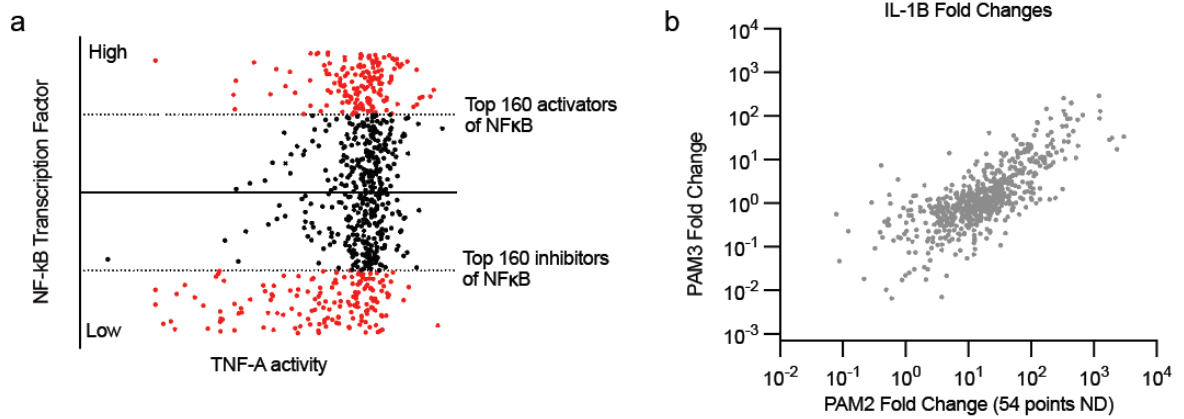

**Fig. S7. Cytokine concentrations trends with transcription factor activity and agonist similarity** A) For the top active compounds, transcription factor activity correlated with an increase of decrease cytokine response 10 B) IL-1 $\beta$  fold changes (N =720) of Pam2CSK4 versus Pam3CSK4 (Pearson R = 0.4507)

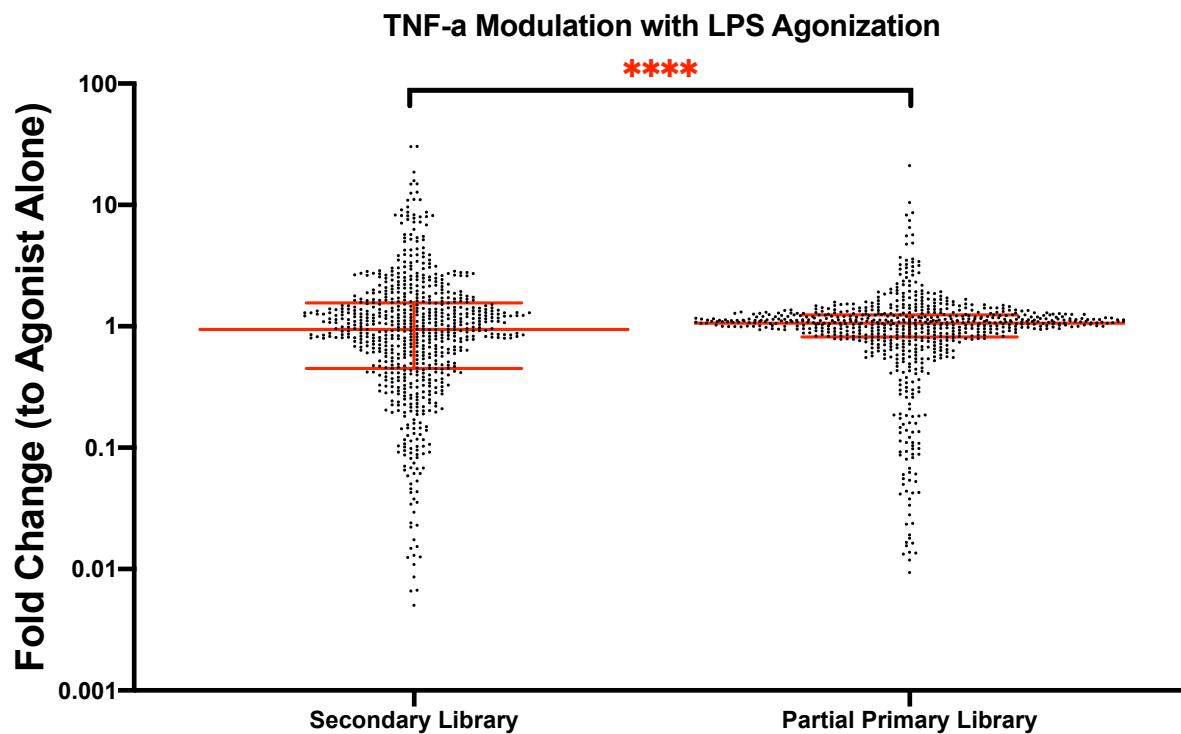

**Fig. S8. Comparison of 720 PCA selected compounds to 720 random subsection of primary screen** TNF- $\alpha$  comparison from a subsection of the primary screen (N=720) and the secondary library (N=720) show a significant increase in modulators that deviate from a fold change of one, showing evidence in the effectiveness of the PCA down selection method. \*\*\*\*P < .0001 Statistical analysis performed was a F Test to compare variance. Kurtosis of log-transformed primary screen: 6.884, secondary screen: 5.907.

|                                        | <b>IL-1<math>\beta</math></b> | <b>IL-12</b> | <b>IP-10</b> | <b>CCL4</b> | <b>TNF-<math>\alpha</math></b> | <b>IFN-<math>\beta</math></b> |
|----------------------------------------|-------------------------------|--------------|--------------|-------------|--------------------------------|-------------------------------|
| Weight factor per cytokine (enhancer)  | -0.5                          | 1            | 1            | 0.5         | -2                             | 2                             |
| Weight factor per cytokine (inhibitor) | 0.5                           | -1           | -1           | -0.5        | 2                              | 0                             |

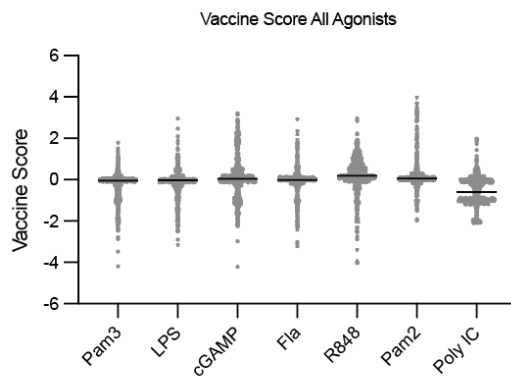

**Fig. S9. Vaccine score generation.** A) Table of weight factors for each cytokine for vaccine score B) Vaccine score for each agonist (N=720), individual agonist vaccine scores are summed up to create the generalist vaccine score.



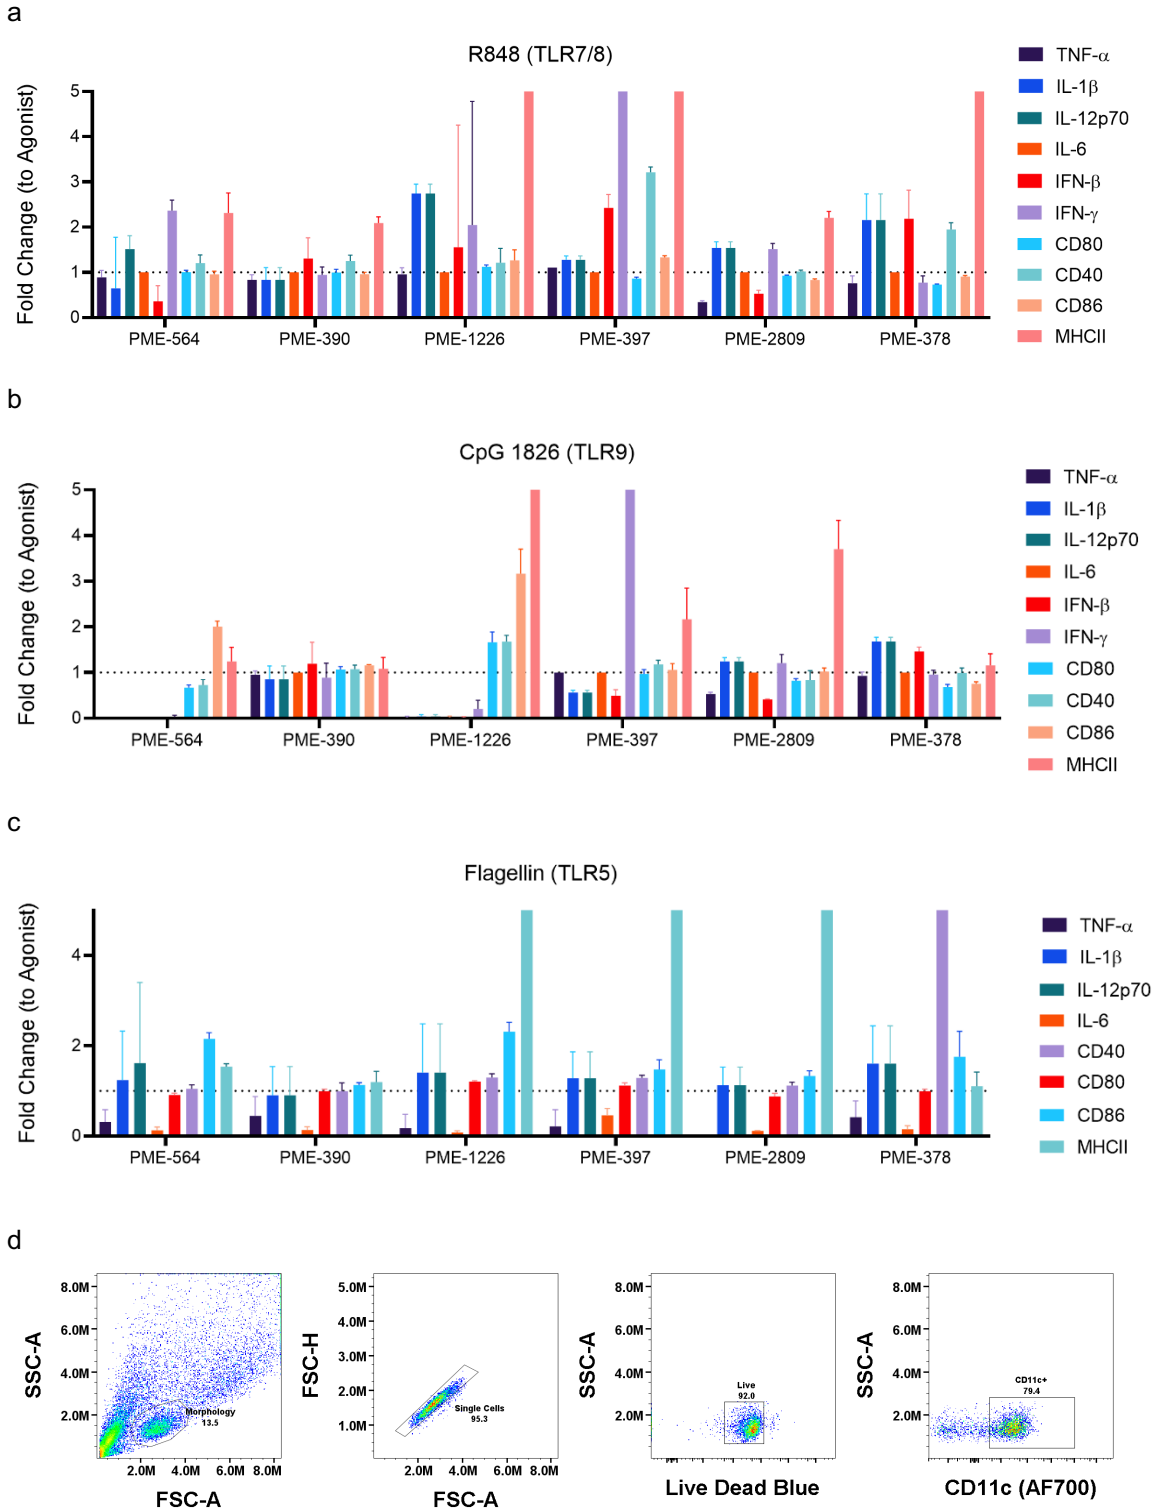

**Fig. S10. BMDC immunomodulation distribution of top candidates from vaccine score**  
 Cytokines and cell surface markers were measured 24 hours after agonizing with A) R848, B) Flagellin, and C) CpG. Modulators show significant ability to lower inflammatory cytokines in primary cells as well enhance cell surface markers. D) Gating strategy for flow cytometry

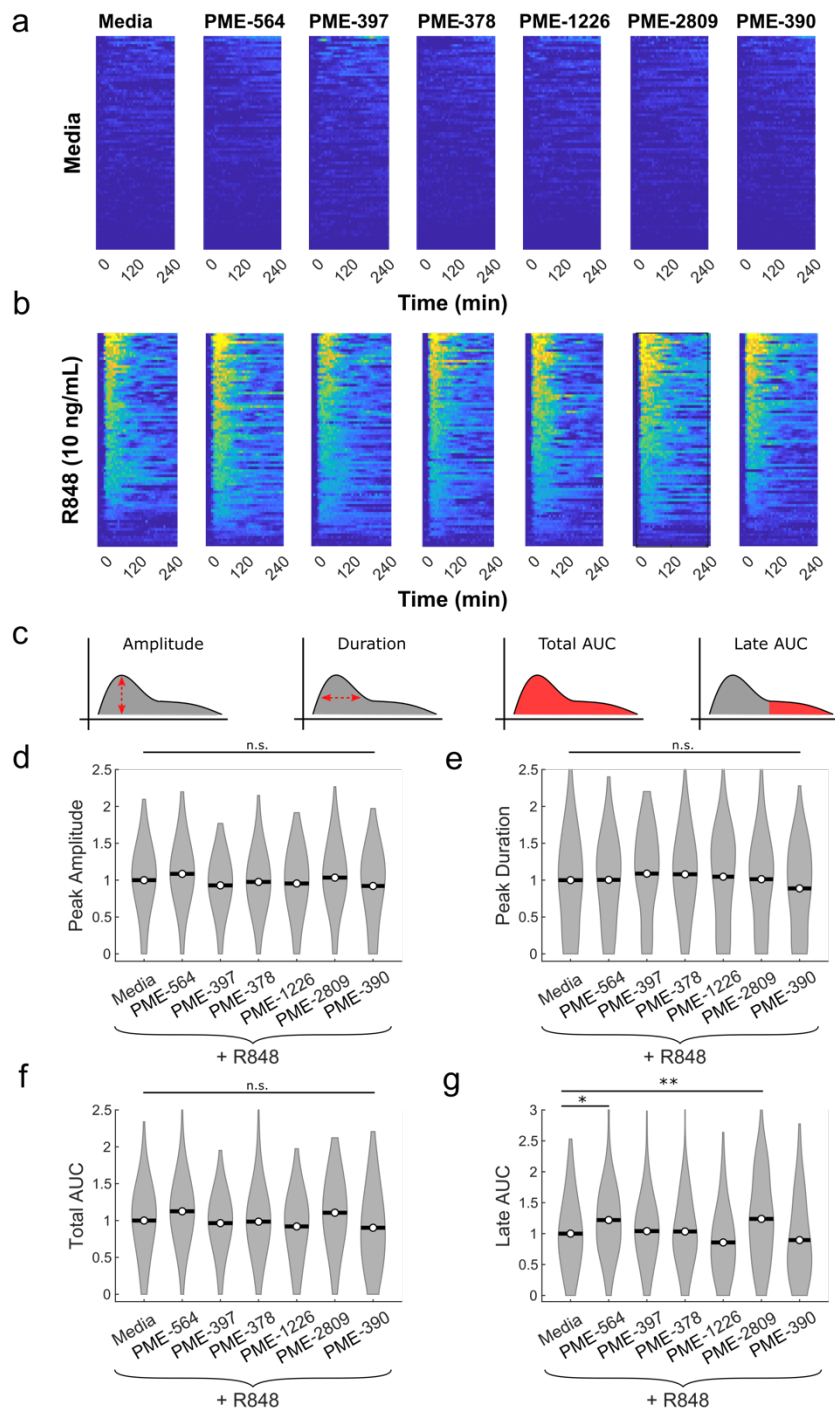

**S11. Effect of top candidates on NF- $\kappa$ B activation dynamics.** A-B) Heatmap of single cell NF- $\kappa$ B activation over time following treatment with modulators alone A) or modulators followed by 10 ng/mL R848 B). Each row is one of 80 randomly selected single cell traces for each condition. Data are from  $\geq 90$  single cells from two replicates. C) Schematic of NF- $\kappa$ B activation features measured for each trace. D-G) Violin plot showing distribution of single cell trace features in cells treated with top candidates following R848 stimulation. Black line and open circle show mean response. Measured features are D) amplitude, E) duration, F) total AUC, and G) late AUC as in c). \*  $p < 0.05$ , \*\*  $p < 0.01$ , n.s. not significant using Bonferroni-corrected two-tailed t-test.

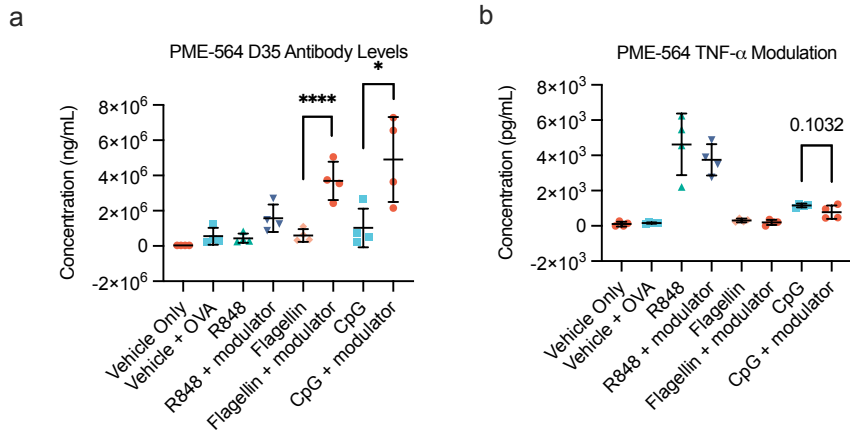

**Fig. S12. *In vivo* immunomodulation with PME-564 against OVA** A) PME-564 serum anti-OVA IgG antibody level, day 35,  $n = 4$ . B) Systemic TNF- $\alpha$  levels 1 hour after vaccination with agonist, agonist + modulator, and vehicle ( $N=4$ ) for Flagellin (TLR5), R848 (TLR7/8) and CpG (TLR9). PME-564 statistical analyses between agonist and agonist + PME-564 were performed by an unpaired  $t$  test. \* $P < 0.05$ , \*\* $P < 0.01$ , \*\*\* $P < 0.001$ , \*\*\*\* $P < 0.0001$ . n.s., not significant.

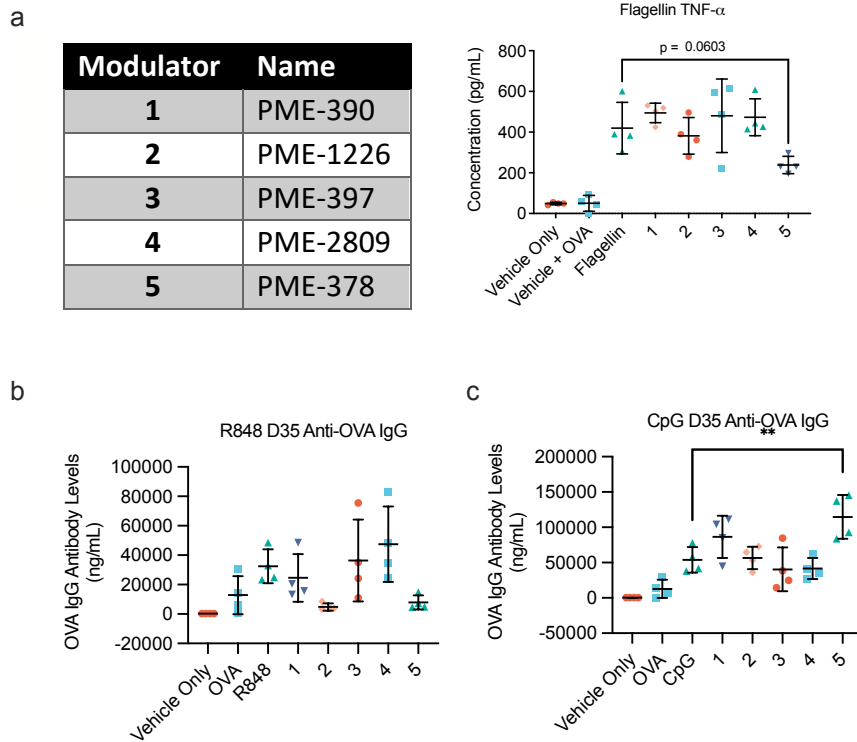

**Fig. S13. *In vivo* immunomodulation of expanded generalist modulator panel.** A) Compounds used for *in vivo* experiments. B) Systemic TNF- $\alpha$  levels 1 hour after vaccination with agonist, agonist + modulator, and vehicle (N=4) for Flagellin (TLR5) C) Modulator serum anti-OVA IgG antibody level for R848 (TLR7/8), and D) CPG (TLR9) on day 35,  $n = 4$ . Statistical analyses between agonist and agonist + modulator was performed by an unpaired  $t$  test. \* $P < 0.05$ , \*\* $P < 0.01$ , \*\*\* $P < 0.001$ , \*\*\*\* $P < 0.0001$ . n.s., not significant.

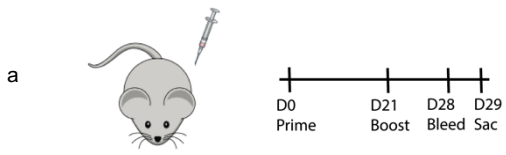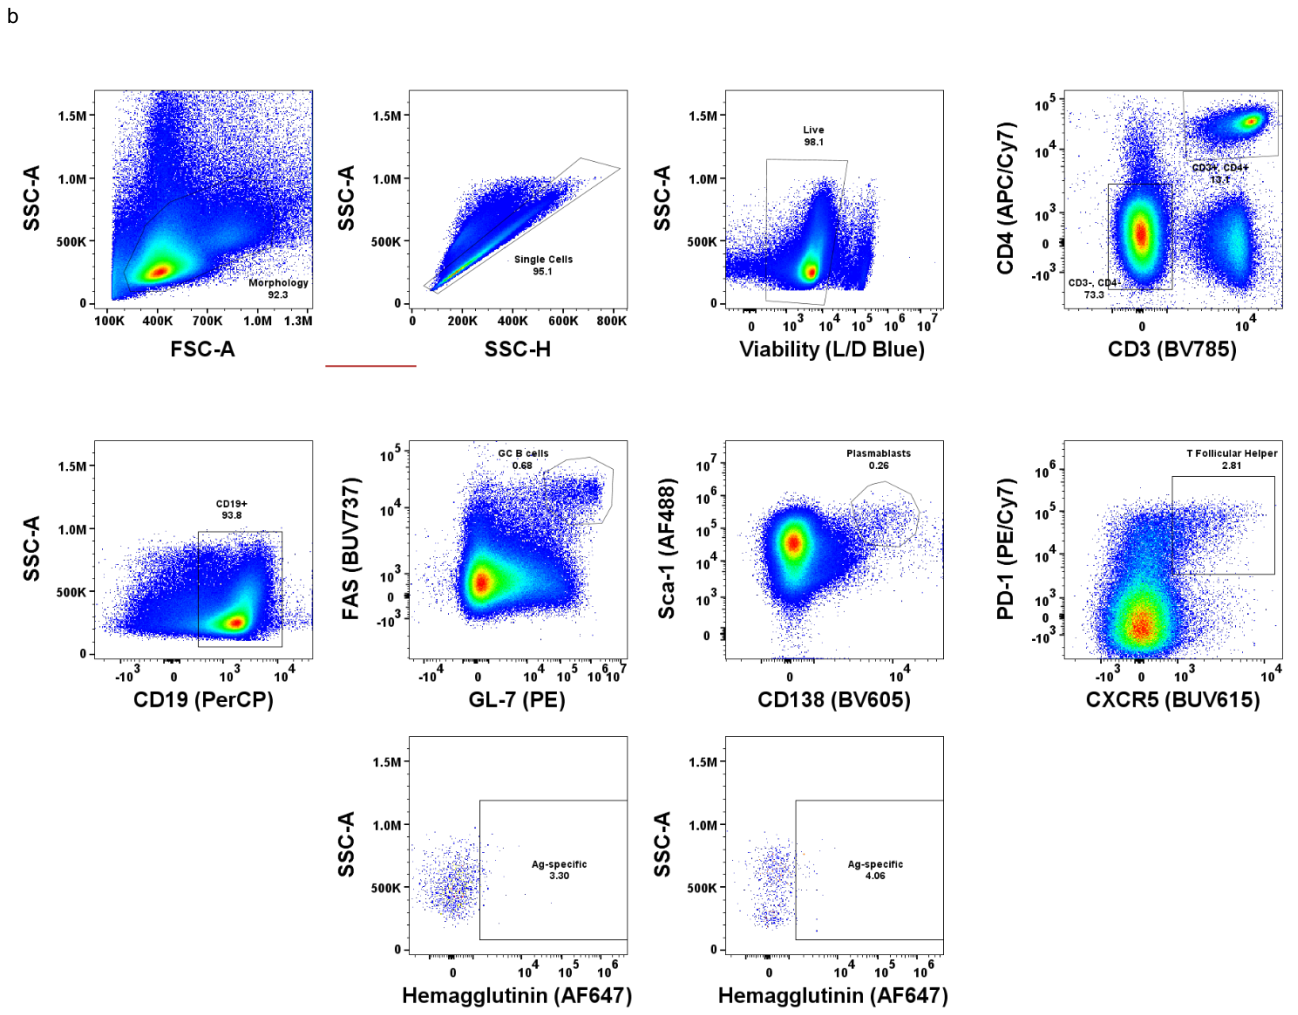

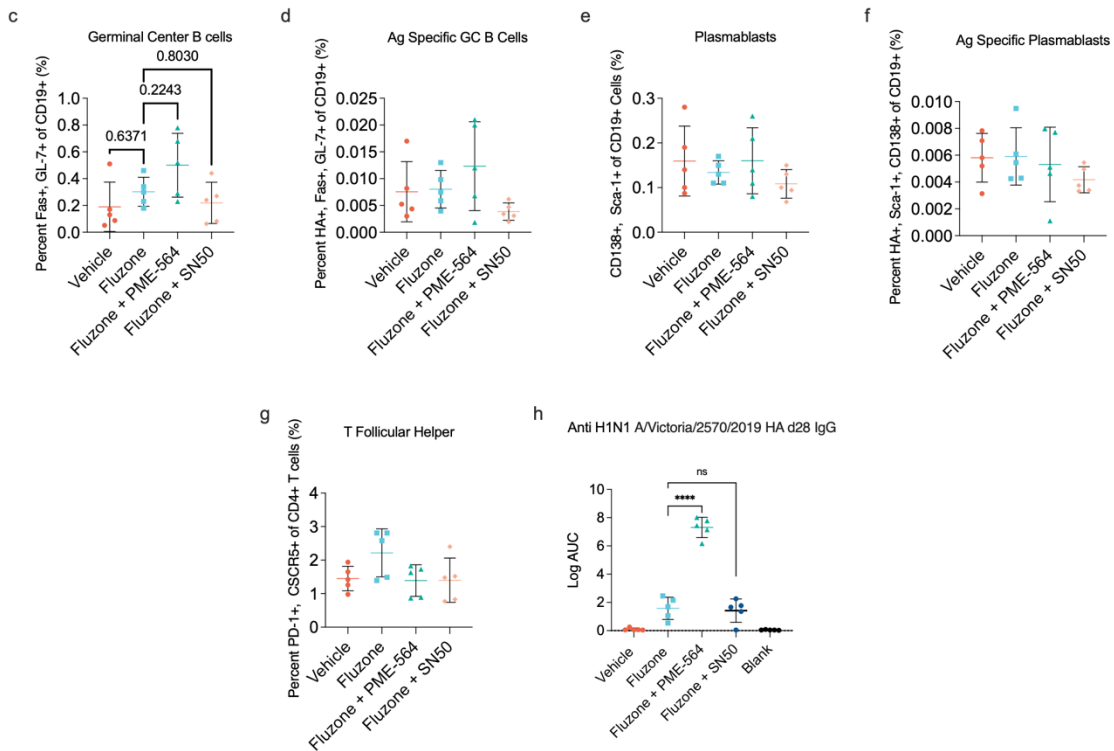

**Fig. S14. Quantification of cell types critical for antibody production** A) Schematic of *in vivo* study (N=5). B) Gating strategy for flow cytometry C/D/E/F/G) *In vivo* analysis of immune cells subsets. H) Modulator serum anti-OVA IgG antibody level on day 28. Statistical analyses between Fluzone + modulator groups and Fluzone alone were performed by a one-way ANOVA test \* $P < 0.05$ , \*\* $P < 0.01$ , \*\*\* $P < 0.001$ , \*\*\*\* $P < 0.0001$ . n.s., not significant.

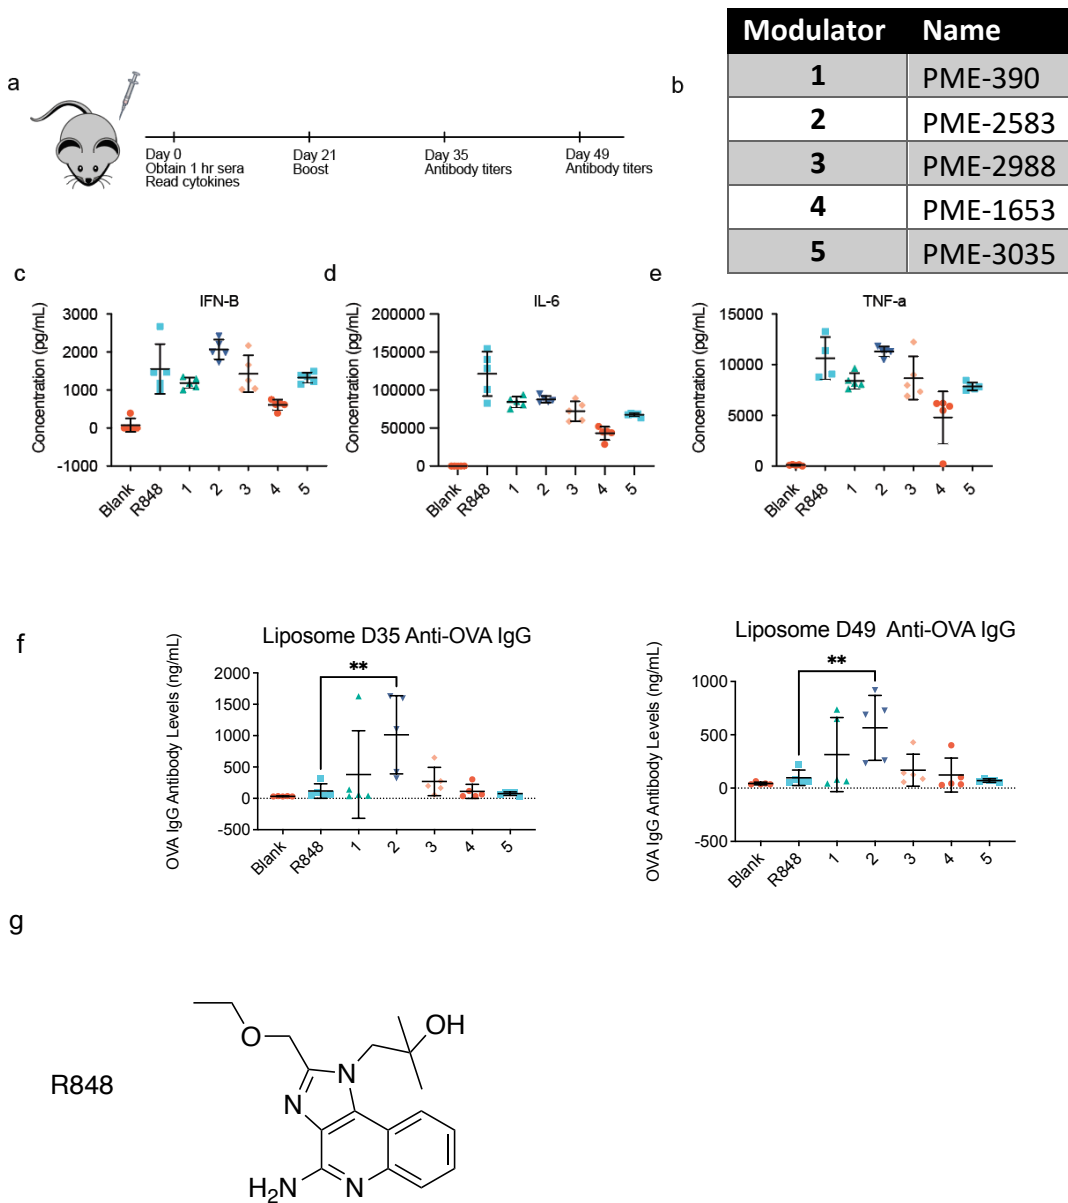

**Fig. S15. Preliminary *in vivo* immunomodulation against OVA formulated in liposomes.** A) Schematic of *in vivo* study B) Modulators studied *in vivo* were top performers in the constructed vaccine score C/D/E) *In vitro* IFN- $\beta$ , IL-6, TNF- $\alpha$  levels 24 hour after addition with agonist in BMDCs. F) Modulator serum anti-OVA IgG antibody level on day 35 and 49. G) Structure of R848. Statistical analyses between agonist + modulator groups and agonist alone were performed by a one-way ANOVA test \* $P < 0.05$ , \*\* $P < 0.01$ , \*\*\* $P < 0.001$ , \*\*\*\* $P < 0.0001$ . n.s., not significant.

**Table S1. Compounds from primary screen**

| <b>Library</b>                            | <b>Source</b>   | <b>Number</b> |
|-------------------------------------------|-----------------|---------------|
| <b>Inhibitors</b>                         | Selleckchem     | 2790          |
| <b>NF-<math>\kappa</math>B Inhibitors</b> | Selleckchem     | 41            |
| <b>NF-<math>\kappa</math>B Inhibitors</b> | MedChem Express | 206           |
| <b>Tolerance</b>                          | Various         | 104           |
|                                           | <b>Total</b>    | 3141          |



**Table S2. Agonists used in primary screen.** Agonist targets, pathways activated, and working concentrations.

| <i>Agonist</i>    | <i>Target</i> | <i>NF-κB</i> | <i>IRF</i> | <i>Conc (ug/mL)</i> |
|-------------------|---------------|--------------|------------|---------------------|
| <i>Pam2CSK4</i>   | TLR2/1        | X            |            | <b>0.1</b>          |
| <i>Pam2CSK4</i>   | TLR2/6        | X            |            | <b>0.1</b>          |
| <i>Poly I:C</i>   | TLR3          |              | X          | <b>1</b>            |
| <i>MPLA</i>       | TLR4          | X            | X          | <b>0.25</b>         |
| <i>LPS</i>        | TLR4          | X            | X          | <b>0.1</b>          |
| <i>Flagellin</i>  | TLR5          | X            | X          | <b>1</b>            |
| <i>Imiquimod</i>  | TLR7          | X            | X          | <b>2.5</b>          |
| <i>TL8-506</i>    | TLR8          |              | X          | <b>0.1</b>          |
| <i>ODN 1826</i>   | TLR9          | X            | X          | <b>0.5</b>          |
| <i>3'3'-cGAMP</i> | STING         |              | X          | <b>10</b>           |
| <i>Tri-DAP</i>    | NOD1          | X            |            | <b>25</b>           |
| <i>MDP</i>        | NOD2          | X            |            | <b>10</b>           |
| <i>mIFN-β</i>     | IFNAR1/2      | X            | X          | <b>0.00833</b>      |

**Table S3. Z-factor analysis of primary screen agonists.** High throughput screening utilizes Z-factors as a proxy for statistical reliability of an assay, due to the dynamic range of the positive controls and the inherent pathways for each agonist, a Z-factor score greater than zero was not obtained for certain agonists/transcription factor combinations.

| <b>Agonist</b>    | <b>Target</b> | <b>NF-κB Activator</b> | <b>NF-κB Z- factor</b> | <b>IRF Activator</b> | <b>IRF Z- factor</b> |
|-------------------|---------------|------------------------|------------------------|----------------------|----------------------|
| <b>Pam3CSK4</b>   | TLR 2/1       | x                      | 0.193448               |                      | <0                   |
| <b>Pam2CSK4</b>   | TLR 2/6       | x                      | 0.509904               |                      | <0                   |
| <b>Poly I:C</b>   | TLR3          |                        | <0                     | x                    | <0                   |
| <b>MPLA</b>       | TLR4          | x                      | 0.729615               | x                    | 0.668819             |
| <b>LPS</b>        | TLR4          | x                      | 0.330641               | x                    | 0.425865             |
| <b>Flagellin</b>  | TLR5          |                        | <0                     |                      | <0                   |
| <b>Imiquimod</b>  | TLR7          | x                      | 0.826412               |                      | <0                   |
| <b>TL8-506</b>    | TLR8          |                        | <0                     |                      | <0                   |
| <b>ODN 1826</b>   | TLR9          | x                      | 0.785698               | x                    | <0                   |
| <b>3'3'-cGAMP</b> | STING         |                        | <0                     | x                    | 0.699694             |
| <b>Tri-DAP</b>    | NOD1          |                        | <0                     |                      | <0                   |
| <b>MDP</b>        | NOD2          |                        | <0                     |                      | <0                   |
| <b>mIFN-β</b>     | IFNAR1/2      |                        | <0                     | x                    | <0                   |

**Table S4. Cytokines measured in secondary screen.** Functions of cytokines chosen for secondary screen in AlphaPlex investigation

| <b><i>Cytokine</i></b> | <b><i>Function</i></b>                                                   |
|------------------------|--------------------------------------------------------------------------|
| TNF- $\alpha$          | Promotes inflammation                                                    |
| IL-1 $\beta$           | Fever, partially outside NF- $\kappa$ B                                  |
| IFN- $\beta$           | Antiviral, increased MHCI                                                |
| IL-12/23 (p40)         | Activates NK cells, induces IFN- $\gamma$ , roles in T-cell polarization |
| IP-10 (CXCL10)         | Chemoattractant for T cells, DCs                                         |
| CCL4                   | Chemoattractant for monocytes, NK cells, others                          |

**Table S5. Z-factor analysis of secondary screen.** High throughput screening utilizes Z-factors as a proxy for statistical reliability of an assay, due to the dynamic range of the positive controls and the inherent cytokines secreted for each agonist, a Z-factor score greater than zero was not obtained for certain agonists/transcription factor combinations.

| Agonist           | Target | Conc<br>( $\mu\text{g/mL}$ ) | Cytokine     |       |       |      |               |              |
|-------------------|--------|------------------------------|--------------|-------|-------|------|---------------|--------------|
|                   |        |                              | IL-1 $\beta$ | IL-12 | IP-10 | CCL4 | TNF- $\alpha$ | IFN- $\beta$ |
| <b>Pam3CSK4</b>   | TLR2/1 | 0.1                          | .51          | .67   | .23   | .82  | .68           | -            |
| <b>Pam2CSK4</b>   | TLR2/6 | 0.1                          | -.76         | .69   | .12   | .62  | .66           | -            |
| <b>LPS</b>        | TLR4   | 0.1                          | .69          | .32   | .50   | .67  | .71           | -            |
| <b>Flagellin</b>  | TLR5   | 1                            | .03          | .60   | -.19  | .57  | .71           | -            |
| <b>R848</b>       | TLR7   | 10                           | .79          | .88   | .87   | .56  | .61           | -.6          |
| <b>3'3'-cGAMP</b> | STING  | 10                           | -            | -     | -     | -    | -.69          | -            |
| <b>Poly IC</b>    | TLR3   | 1                            | -            | -     | -     | -    | -             | -            |
| <b>Mods alone</b> |        |                              |              |       |       |      |               |              |
